# Supplementary material
Source: PubMed Central journal article supplement (PMC9020151)

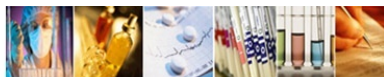

Clinical Trial Details (PDF Generation Date :- Mon, 15 Nov 2021 13:26:11 GMT)

|                                                                                            |                                                                                                                                                                                                   |                                                                                                                    |
|--------------------------------------------------------------------------------------------|---------------------------------------------------------------------------------------------------------------------------------------------------------------------------------------------------|--------------------------------------------------------------------------------------------------------------------|
| <b>CTRI Number</b>                                                                         | CTRI/2018/04/013179 [Registered on: 11/04/2018] - <b>Trial Registered Prospectively</b>                                                                                                           |                                                                                                                    |
| <b>Last Modified On</b>                                                                    | 06/08/2021                                                                                                                                                                                        |                                                                                                                    |
| <b>Post Graduate Thesis</b>                                                                | No                                                                                                                                                                                                |                                                                                                                    |
| <b>Type of Trial</b>                                                                       | Interventional                                                                                                                                                                                    |                                                                                                                    |
| <b>Type of Study</b>                                                                       | Behavioral                                                                                                                                                                                        |                                                                                                                    |
| <b>Study Design</b>                                                                        | Randomized, Parallel Group Trial                                                                                                                                                                  |                                                                                                                    |
| <b>Public Title of Study</b>                                                               | Intensive dietary counseling in non alcoholic fatty liver disease                                                                                                                                 |                                                                                                                    |
| <b>Scientific Title of Study</b>                                                           | Efficacy of intensive dietary counseling on metabolic, anthropometric and ultrasound parameters among adult Indian Non alcoholic fatty liver disease (NAFLD) patients: A Randomized control trial |                                                                                                                    |
| <b>Secondary IDs if Any</b>                                                                | <b>Secondary ID</b>                                                                                                                                                                               | <b>Identifier</b>                                                                                                  |
|                                                                                            | NIL                                                                                                                                                                                               | NIL                                                                                                                |
| <b>Details of Principal Investigator or overall Trial Coordinator (multi-center study)</b> | <b>Details of Principal Investigator</b>                                                                                                                                                          |                                                                                                                    |
|                                                                                            | <b>Name</b>                                                                                                                                                                                       | Dr Piyush Ranjan                                                                                                   |
|                                                                                            | <b>Designation</b>                                                                                                                                                                                | Associate Professor                                                                                                |
|                                                                                            | <b>Affiliation</b>                                                                                                                                                                                | AIIMS, New Delhi                                                                                                   |
|                                                                                            | <b>Address</b>                                                                                                                                                                                    | Department of Medicine All India Institute of Medical Sciences New Delhi<br>South West<br>DELHI<br>110029<br>India |
|                                                                                            | <b>Phone</b>                                                                                                                                                                                      | 9268714198                                                                                                         |
|                                                                                            | <b>Fax</b>                                                                                                                                                                                        |                                                                                                                    |
|                                                                                            | <b>Email</b>                                                                                                                                                                                      | drpiyushaiims@gmail.com                                                                                            |
| <b>Details Contact Person (Scientific Query)</b>                                           | <b>Details Contact Person (Scientific Query)</b>                                                                                                                                                  |                                                                                                                    |
|                                                                                            | <b>Name</b>                                                                                                                                                                                       | Dr Piyush Ranjan                                                                                                   |
|                                                                                            | <b>Designation</b>                                                                                                                                                                                | Associate Professor                                                                                                |
|                                                                                            | <b>Affiliation</b>                                                                                                                                                                                | AIIMS, New Delhi                                                                                                   |
|                                                                                            | <b>Address</b>                                                                                                                                                                                    | Department of Medicine All India Institute of Medical Sciences New Delhi<br>South West<br>DELHI<br>110029<br>India |
|                                                                                            | <b>Phone</b>                                                                                                                                                                                      | 9268714198                                                                                                         |
|                                                                                            | <b>Fax</b>                                                                                                                                                                                        |                                                                                                                    |
|                                                                                            | <b>Email</b>                                                                                                                                                                                      | drpiyushaiims@gmail.com                                                                                            |
| <b>Details Contact Person (Public Query)</b>                                               | <b>Details Contact Person (Public Query)</b>                                                                                                                                                      |                                                                                                                    |
|                                                                                            | <b>Name</b>                                                                                                                                                                                       | Dr Piyush Ranjan                                                                                                   |
|                                                                                            | <b>Designation</b>                                                                                                                                                                                | Associate Professor                                                                                                |
|                                                                                            | <b>Affiliation</b>                                                                                                                                                                                | AIIMS, New Delhi                                                                                                   |
|                                                                                            | <b>Address</b>                                                                                                                                                                                    | Department of Medicine All India Institute of Medical Sciences New Delhi<br>South West<br>DELHI<br>110029<br>India |
|                                                                                            | <b>Phone</b>                                                                                                                                                                                      | 9268714198                                                                                                         |



|                                               |                                               |                                                                                                                                                                                                                                                                    |
|-----------------------------------------------|-----------------------------------------------|--------------------------------------------------------------------------------------------------------------------------------------------------------------------------------------------------------------------------------------------------------------------|
|                                               | <b>Fax</b>                                    |                                                                                                                                                                                                                                                                    |
|                                               | <b>Email</b>                                  | drpiyushaiims@gmail.com                                                                                                                                                                                                                                            |
| <b>Source of Monetary or Material Support</b> | <b>Source of Monetary or Material Support</b> |                                                                                                                                                                                                                                                                    |
|                                               | > Facilities provided by AIIMS, New Delhi     |                                                                                                                                                                                                                                                                    |
| <b>Primary Sponsor</b>                        | <b>Primary Sponsor Details</b>                |                                                                                                                                                                                                                                                                    |
|                                               | <b>Name</b>                                   | NONE                                                                                                                                                                                                                                                               |
|                                               | <b>Address</b>                                | NA                                                                                                                                                                                                                                                                 |
|                                               | <b>Type of Sponsor</b>                        | Other [NO FINANCIAL SUPPORT IS REQUIRED]                                                                                                                                                                                                                           |
| <b>Details of Secondary Sponsor</b>           | <b>Name</b>                                   | <b>Address</b>                                                                                                                                                                                                                                                     |
|                                               | NIL                                           | NIL                                                                                                                                                                                                                                                                |
| <b>Countries of Recruitment</b>               | <b>List of Countries</b>                      |                                                                                                                                                                                                                                                                    |
|                                               | India                                         |                                                                                                                                                                                                                                                                    |
| <b>Sites of Study</b>                         | <b>Name of Principal Investigator</b>         | <b>Name of Site</b>                                                                                                                                                                                                                                                |
|                                               | Dr Piyush Ranjan                              | All India Institute of medical sciences                                                                                                                                                                                                                            |
|                                               |                                               | <b>Site Address</b>                                                                                                                                                                                                                                                |
|                                               |                                               | Department of Medicine<br>All India Institute of Medical Sciences New Delhi<br>South West DELHI                                                                                                                                                                    |
|                                               |                                               | <b>Phone/Fax/Email</b>                                                                                                                                                                                                                                             |
|                                               |                                               | 9268714198<br>drpiyushaiims@gmail.com                                                                                                                                                                                                                              |
| <b>Details of Ethics Committee</b>            | <b>Name of Committee</b>                      | <b>Approval Status</b>                                                                                                                                                                                                                                             |
|                                               | INSTITUTE ETHICS COMMITTEE AIIMS NEW DELHI    | Approved                                                                                                                                                                                                                                                           |
|                                               |                                               | <b>Date of Approval</b>                                                                                                                                                                                                                                            |
|                                               |                                               | 25/08/2017                                                                                                                                                                                                                                                         |
|                                               |                                               | <b>Is Independent Ethics Committee?</b>                                                                                                                                                                                                                            |
|                                               |                                               | Yes                                                                                                                                                                                                                                                                |
| <b>Regulatory Clearance Status from DCGI</b>  | <b>Status</b>                                 | <b>Date</b>                                                                                                                                                                                                                                                        |
|                                               | Not Applicable                                | No Date Specified                                                                                                                                                                                                                                                  |
| <b>Health Condition / Problems Studied</b>    | <b>Health Type</b>                            | <b>Condition</b>                                                                                                                                                                                                                                                   |
|                                               | Patients                                      | Clinically stable patients with Non Alcoholic Fatty Liver Disease                                                                                                                                                                                                  |
| <b>Intervention / Comparator Agent</b>        | <b>Type</b>                                   | <b>Name</b>                                                                                                                                                                                                                                                        |
|                                               | Intervention                                  | Intensive dietary counseling along with standard care                                                                                                                                                                                                              |
|                                               |                                               | <b>Details</b>                                                                                                                                                                                                                                                     |
|                                               |                                               | 5 face to face and 4 telephonic dietary counseling sessions by a trained dietitian                                                                                                                                                                                 |
|                                               | Comparator Agent                              | Standard therapy                                                                                                                                                                                                                                                   |
|                                               |                                               | NAFLD patients receiving standard therapy                                                                                                                                                                                                                          |
| <b>Inclusion Criteria</b>                     | <b>Inclusion Criteria</b>                     |                                                                                                                                                                                                                                                                    |
|                                               | <b>Age From</b>                               | 18.00 Year(s)                                                                                                                                                                                                                                                      |
|                                               | <b>Age To</b>                                 | 60.00 Year(s)                                                                                                                                                                                                                                                      |
|                                               | <b>Gender</b>                                 | Both                                                                                                                                                                                                                                                               |
|                                               | <b>Details</b>                                | 1. Patients diagnosed with NAFLD in the age group of 18- 60 years attending the OPD<br>2. Willing to give written consent for participation in the study<br>3. Patients with BMI between 25-29.9kg/m2                                                              |
| <b>Exclusion Criteria</b>                     | <b>Exclusion Criteria</b>                     |                                                                                                                                                                                                                                                                    |
|                                               | <b>Details</b>                                | 1. Alcohol intake >30gm/day in males or 20gm/day in females<br>2. Inability to attend follow-up session<br>3. Pregnant, lactating women or pregnancy anticipated during study<br>4. Diagnosed cases of Diabetes<br>5. Thyroid disease not controlled by medication |

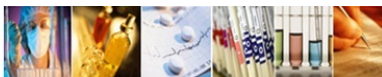

|                                                                                                                                                                                                                                                                                                                                                                                                                                                               | <p>6. Already participating in a formal weight loss program or on medication to promote weight loss</p> <p>7. Significant changes in diet and exercise habits in previous 3 months resulting in weight loss &gt;5% of body weight.</p> <p>8. Known cases of endocrine disorders including Cushing's syndrome or history of long term steroid intake or any other secondary causes of fatty liver.</p> <p>9. Known case of psychiatric illness</p>                                                                                                                                                                             |         |            |                                                                                                                                                                                                                                                                                                                                                                                                                                                               |                |  |
|---------------------------------------------------------------------------------------------------------------------------------------------------------------------------------------------------------------------------------------------------------------------------------------------------------------------------------------------------------------------------------------------------------------------------------------------------------------|-------------------------------------------------------------------------------------------------------------------------------------------------------------------------------------------------------------------------------------------------------------------------------------------------------------------------------------------------------------------------------------------------------------------------------------------------------------------------------------------------------------------------------------------------------------------------------------------------------------------------------|---------|------------|---------------------------------------------------------------------------------------------------------------------------------------------------------------------------------------------------------------------------------------------------------------------------------------------------------------------------------------------------------------------------------------------------------------------------------------------------------------|----------------|--|
| <b>Method of Generating Random Sequence</b>                                                                                                                                                                                                                                                                                                                                                                                                                   | Computer generated randomization                                                                                                                                                                                                                                                                                                                                                                                                                                                                                                                                                                                              |         |            |                                                                                                                                                                                                                                                                                                                                                                                                                                                               |                |  |
| <b>Method of Concealment</b>                                                                                                                                                                                                                                                                                                                                                                                                                                  | Sequentially numbered, sealed, opaque envelopes                                                                                                                                                                                                                                                                                                                                                                                                                                                                                                                                                                               |         |            |                                                                                                                                                                                                                                                                                                                                                                                                                                                               |                |  |
| <b>Blinding/Masking</b>                                                                                                                                                                                                                                                                                                                                                                                                                                       | Outcome Assessor Blinded                                                                                                                                                                                                                                                                                                                                                                                                                                                                                                                                                                                                      |         |            |                                                                                                                                                                                                                                                                                                                                                                                                                                                               |                |  |
| <b>Primary Outcome</b>                                                                                                                                                                                                                                                                                                                                                                                                                                        | <table border="1"> <thead> <tr> <th>Outcome</th> <th>Timepoints</th> </tr> </thead> <tbody> <tr> <td>1) Change in CAP score in fibroscan after 6 months<br/>2) Reduction of liver enzymes<br/>3) Reduction in grade of steatosis through abdominal ultrasound<br/>4) Reduction in 5% of the body weight among patients of NAFLD with normal liver enzymes and 10% of body weight among patients of NAFLD with raised liver enzymes<br/>5) Reduction in waist circumference<br/>6) Reduction in fat percentage through body composition analysis<br/>7) Change in HOMA IR</td> <td>3 and 6 months</td> </tr> </tbody> </table> | Outcome | Timepoints | 1) Change in CAP score in fibroscan after 6 months<br>2) Reduction of liver enzymes<br>3) Reduction in grade of steatosis through abdominal ultrasound<br>4) Reduction in 5% of the body weight among patients of NAFLD with normal liver enzymes and 10% of body weight among patients of NAFLD with raised liver enzymes<br>5) Reduction in waist circumference<br>6) Reduction in fat percentage through body composition analysis<br>7) Change in HOMA IR | 3 and 6 months |  |
| Outcome                                                                                                                                                                                                                                                                                                                                                                                                                                                       | Timepoints                                                                                                                                                                                                                                                                                                                                                                                                                                                                                                                                                                                                                    |         |            |                                                                                                                                                                                                                                                                                                                                                                                                                                                               |                |  |
| 1) Change in CAP score in fibroscan after 6 months<br>2) Reduction of liver enzymes<br>3) Reduction in grade of steatosis through abdominal ultrasound<br>4) Reduction in 5% of the body weight among patients of NAFLD with normal liver enzymes and 10% of body weight among patients of NAFLD with raised liver enzymes<br>5) Reduction in waist circumference<br>6) Reduction in fat percentage through body composition analysis<br>7) Change in HOMA IR | 3 and 6 months                                                                                                                                                                                                                                                                                                                                                                                                                                                                                                                                                                                                                |         |            |                                                                                                                                                                                                                                                                                                                                                                                                                                                               |                |  |
| <b>Secondary Outcome</b>                                                                                                                                                                                                                                                                                                                                                                                                                                      | <table border="1"> <thead> <tr> <th>Outcome</th> <th>Timepoints</th> </tr> </thead> <tbody> <tr> <td>none</td> <td>none</td> </tr> </tbody> </table>                                                                                                                                                                                                                                                                                                                                                                                                                                                                          | Outcome | Timepoints | none                                                                                                                                                                                                                                                                                                                                                                                                                                                          | none           |  |
| Outcome                                                                                                                                                                                                                                                                                                                                                                                                                                                       | Timepoints                                                                                                                                                                                                                                                                                                                                                                                                                                                                                                                                                                                                                    |         |            |                                                                                                                                                                                                                                                                                                                                                                                                                                                               |                |  |
| none                                                                                                                                                                                                                                                                                                                                                                                                                                                          | none                                                                                                                                                                                                                                                                                                                                                                                                                                                                                                                                                                                                                          |         |            |                                                                                                                                                                                                                                                                                                                                                                                                                                                               |                |  |
| <b>Target Sample Size</b>                                                                                                                                                                                                                                                                                                                                                                                                                                     | <p><b>Total Sample Size=140</b><br/> <b>Sample Size from India=140</b><br/> <b>Final Enrollment numbers achieved (Total)=140</b><br/> <b>Final Enrollment numbers achieved (India)=140</b></p>                                                                                                                                                                                                                                                                                                                                                                                                                                |         |            |                                                                                                                                                                                                                                                                                                                                                                                                                                                               |                |  |
| <b>Phase of Trial</b>                                                                                                                                                                                                                                                                                                                                                                                                                                         | N/A                                                                                                                                                                                                                                                                                                                                                                                                                                                                                                                                                                                                                           |         |            |                                                                                                                                                                                                                                                                                                                                                                                                                                                               |                |  |
| <b>Date of First Enrollment (India)</b>                                                                                                                                                                                                                                                                                                                                                                                                                       | 01/05/2018                                                                                                                                                                                                                                                                                                                                                                                                                                                                                                                                                                                                                    |         |            |                                                                                                                                                                                                                                                                                                                                                                                                                                                               |                |  |
| <b>Date of First Enrollment (Global)</b>                                                                                                                                                                                                                                                                                                                                                                                                                      | No Date Specified                                                                                                                                                                                                                                                                                                                                                                                                                                                                                                                                                                                                             |         |            |                                                                                                                                                                                                                                                                                                                                                                                                                                                               |                |  |
| <b>Estimated Duration of Trial</b>                                                                                                                                                                                                                                                                                                                                                                                                                            | <p><b>Years=2</b><br/> <b>Months=0</b><br/> <b>Days=0</b></p>                                                                                                                                                                                                                                                                                                                                                                                                                                                                                                                                                                 |         |            |                                                                                                                                                                                                                                                                                                                                                                                                                                                               |                |  |
| <b>Recruitment Status of Trial (Global)</b>                                                                                                                                                                                                                                                                                                                                                                                                                   | Not Applicable                                                                                                                                                                                                                                                                                                                                                                                                                                                                                                                                                                                                                |         |            |                                                                                                                                                                                                                                                                                                                                                                                                                                                               |                |  |
| <b>Recruitment Status of Trial (India)</b>                                                                                                                                                                                                                                                                                                                                                                                                                    | Completed                                                                                                                                                                                                                                                                                                                                                                                                                                                                                                                                                                                                                     |         |            |                                                                                                                                                                                                                                                                                                                                                                                                                                                               |                |  |
| <b>Publication Details</b>                                                                                                                                                                                                                                                                                                                                                                                                                                    | none                                                                                                                                                                                                                                                                                                                                                                                                                                                                                                                                                                                                                          |         |            |                                                                                                                                                                                                                                                                                                                                                                                                                                                               |                |  |
| <b>Brief Summary</b>                                                                                                                                                                                                                                                                                                                                                                                                                                          | <p>NAFLD is a rapidly emerging chronic liver disorder that is set to become a critical global health problem. Diet is an important pathogenic factor in the progression of this disease (Eslamparast et al, 2015).</p> <p>Lifestyle management is the first line treatment of NAFLD. But, NAFLD</p>                                                                                                                                                                                                                                                                                                                           |         |            |                                                                                                                                                                                                                                                                                                                                                                                                                                                               |                |  |

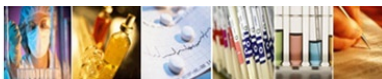

being an asymptomatic disease, adherence to treatment and lifestyle modification advice is poor. Despite the integral role of nutrition counseling in the holistic management of NAFLD, more than 50% of patients do not readily accept its importance nor do they follow the dietary advice (Yasutake et al, 2014). Weight reduction is typically recommended as an initial step in the management of NAFLD, but efficacy data are lacking (Promrat et al, 2010). Traditional dietary counseling methods have failed to bring about desired changes. Merely telling the patient about the potential disease progression, prescribing medications and suggesting lifestyle modification by the physician is not enough. Interventions should be aimed at modifying dietary behaviour to reduce the risk of disease progression. Dietary prescriptions need to be reinforced through multiple sessions to have positive patient outcomes (Schiller MR et al, 1998). The role of intensive nutrition counseling has been well documented in many diseases such as diabetes (Lazo et al, 2010), Cardiovascular disease (American Diabetes foundation, 2005) etc. An American pilot study in the year 2005 has also shown that intensive nutrition counselling can be beneficial in improving histology in NASH patients (Huang et al, 2005). Another Randomized controlled trial from Hong Kong has shown that community based lifestyle modification program is effective in reducing and normalizing liver fat in NAFLD patients (Sun Wong et al, 2013).

NAFLD patients should receive intensive counseling for adherence to a low carbohydrate and low saturated fat diet, avoidance of fructose-enriched soft drinks and increased consumption of fruits and vegetables (Bugianesi et al, 2005). Regular follow up with a dietitian should be an integral part of the treatment protocol. This will help the patients to overcome the barriers that come in the way of adherence to the prescribed diet. Periodic reinforcement of dietary advice, assistance in the form of ready to refer diet education material, easy to prepare healthy recipes, dietitian led support groups to increase motivation to follow the diet regime, are some ways to improve the dietary compliance in these patients.

Prior studies related to the effects of nutrition counseling on weight reduction in NAFLD have been uncontrolled, have used poorly defined patient populations, and non standardized weight loss interventions, and lacked a well-accepted primary outcome for NASH (Clark et al, 2006).



Also, the efficacy of dietary counseling in NAFLD has not been clearly defined in the Indian context, as there have been no randomized, controlled trials of intensive dietary therapy in outpatients with NAFLD. Rigorously conducted, randomized controlled trials are needed in this area.

Hence, this pilot study aims to compare the efficacy of intensive dietary counseling along with standard care versus standard care alone in improving the metabolic, ultrasound and anthropometric parameters in patients with NAFLD.

### **Hypothesis**

Intensive dietary counseling along with standard care may be superior to standard care alone in improving metabolic, ultrasound and anthropometric parameters in patients with NAFLD.

### **Objectives**

#### **Primary objective**

1. To design and develop an intensive dietary intervention program for adult NAFLD patients.
2. [To assess the efficacy of intensive dietary counseling along with standard care in comparison to standard care alone in improving](#) treatment outcomes in adults diagnosed with NAFLD.

#### **Secondary objectives**

1. To assess the anthropometric, biochemical, clinical and dietary profile of patients with NAFLD.

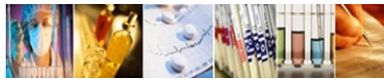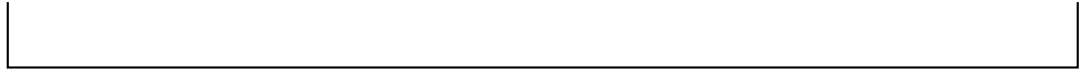

Supplement: 41430_2022_1111_MOESM3_ESM.pdf [file 41430_2022_1111_MOESM3_ESM.pdf]
